# Supplementary material for: CO2 Adsorption on the N- and P-Modified Mesoporous Silicas
Source: MDPI journal article supplement (doi:10.3390/nano12071224), 2022-04-05
Supplement: s1 [file s1]

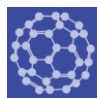

## Supplementary Materials

CO<sub>2</sub> Adsorption on the N- and P-Modified Mesoporous Silicas

Oyundari Tumurbaatar <sup>1</sup>, Hristina Lazarova <sup>1</sup>, Margarita Popova <sup>1</sup>, Violeta Mitova <sup>2</sup>, Pavletta Shestakova <sup>1</sup> and Neli Koseva <sup>2,\*</sup>

<sup>1</sup> Institute of Organic Chemistry with Centre of Phytochemistry, Bulgarian Academy of Sciences, Acad. G. Bonchev St., bl. 9, 1113 Sofia, Bulgaria; oyundari.tumurbaatar@orgchm.bas.bg (O.T.); hristina.lazarova@orgchm.bas.bg (H.L.); margarita.popova@orgchm.bas.bg (M.P.); pavletta.shestakova@orgchm.bas.bg (P.S.)

<sup>2</sup> Institute of Polymers, Bulgarian Academy of Sciences, Acad. G. Bonchev St., bl. 103A, 1113 Sofia, Bulgaria; mitova@polymer.bas.bg

\* Correspondence: koseva@polymer.bas.bg; Tel.: +35-988-729-7361

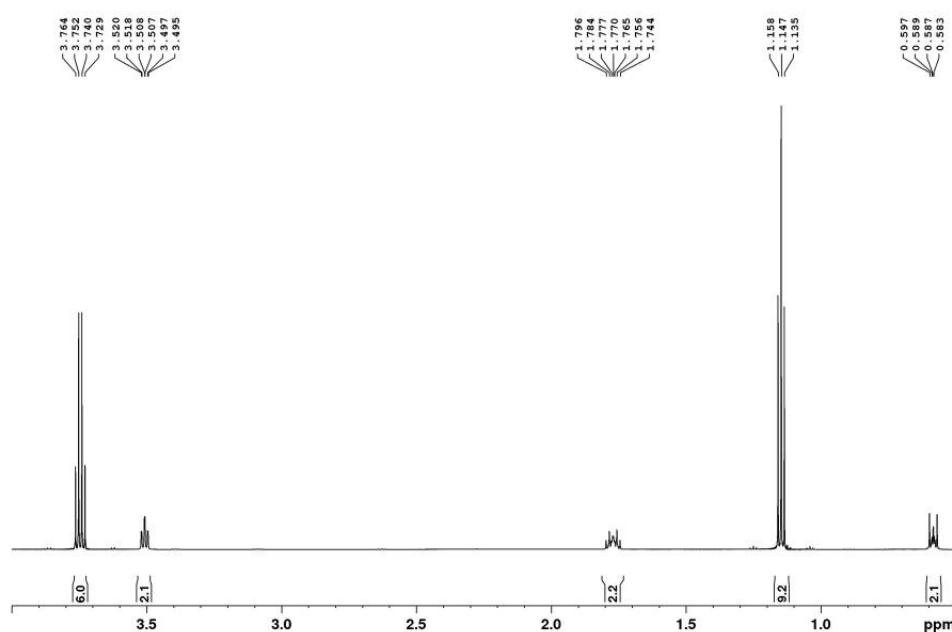

Figure S1. <sup>1</sup>H NMR spectrum of SAPTES in the spectral region from 4 ppm to 0.4 ppm.

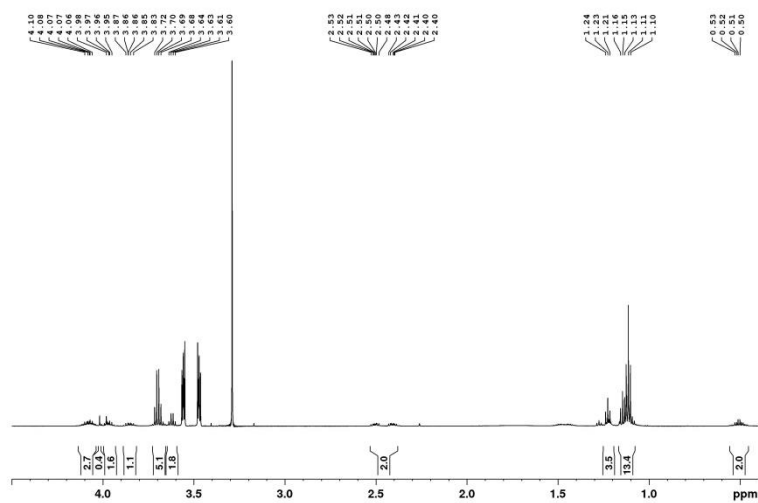

Figure S2. <sup>1</sup>H NMR spectrum of PAPTES in the spectral region from 4.5 ppm to 0.4 ppm.

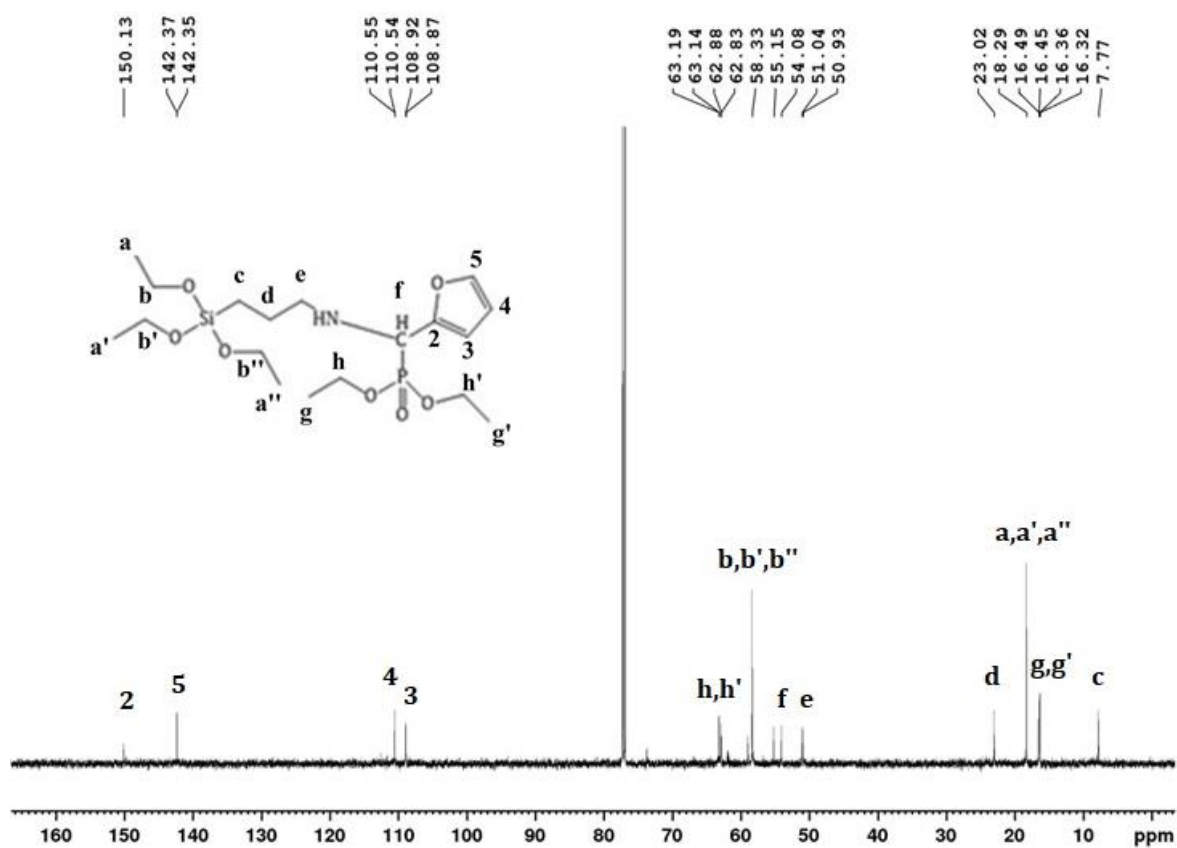

Figure S3. <sup>13</sup>C{H} NMR spectrum of PAPTES.

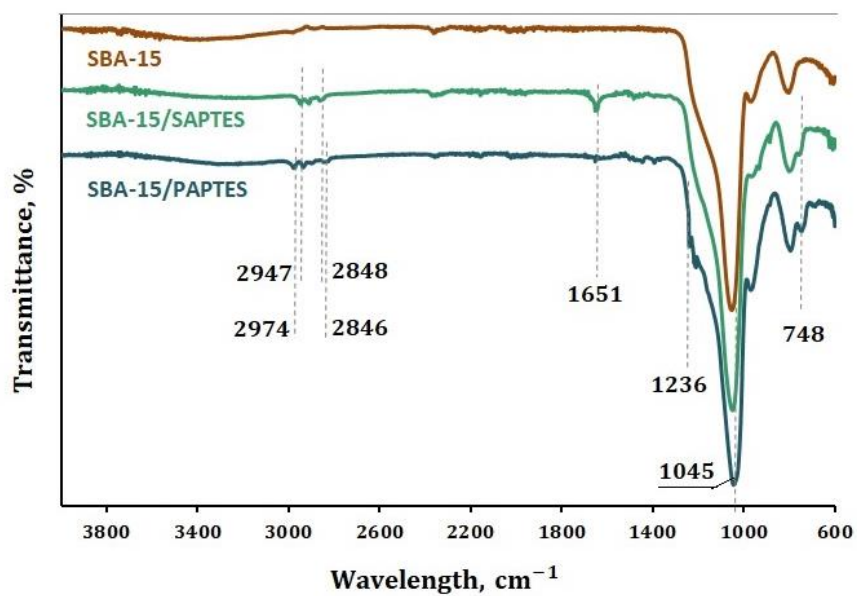

Figure S4. IR spectra of SBA-15, SBA-15/SAPTES and SBA-15/PAPTES.

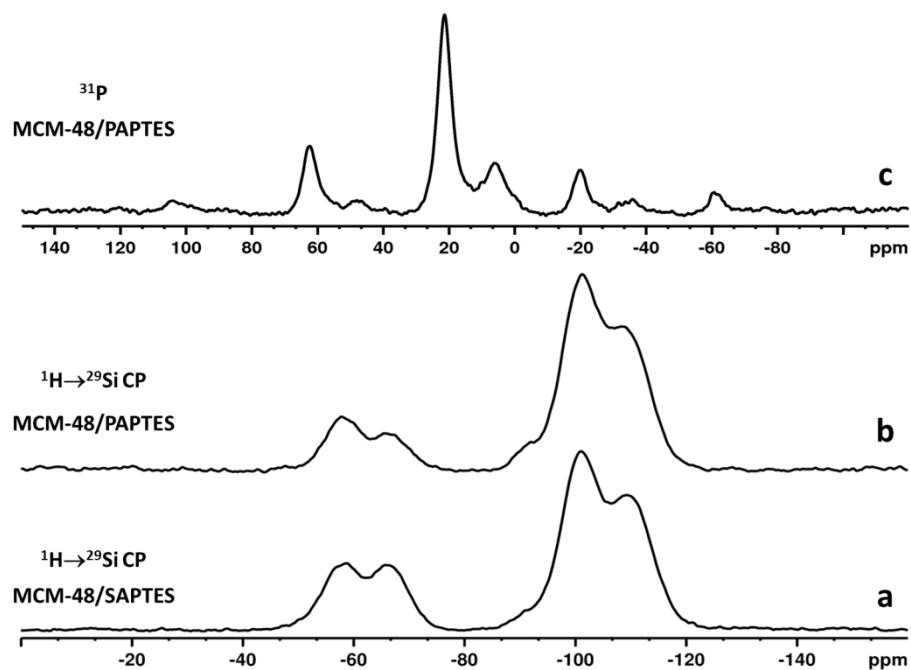

Figure S5. <sup>1</sup>H-><sup>29</sup>Si CP MAS NMR spectra of (a) SAPTES and (b) PAPTES; (c) <sup>31</sup>P spectrum of PAPTES.

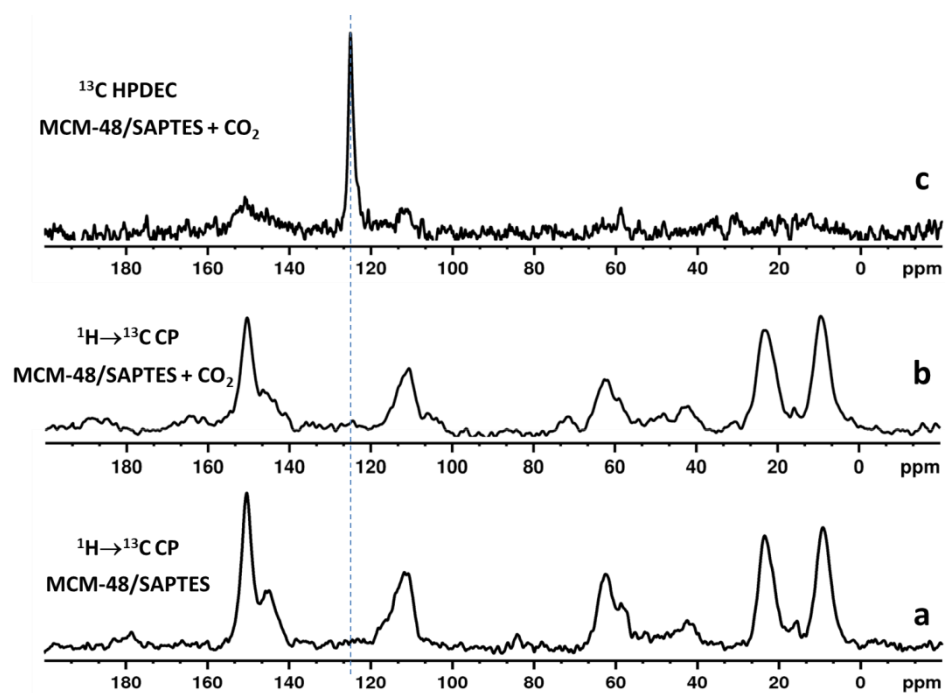

Figure S6. (a)  $^1\text{H} \rightarrow ^{13}\text{C}$  CP MAS NMR spectrum of SAPTES; (b)  $^1\text{H} \rightarrow ^{13}\text{C}$  CP MAS NMR spectrum of  $\text{CO}_2$  loaded SAPTES; (c)  $^{13}\text{C}$  HPDEC spectrum of  $\text{CO}_2$  loaded SAPTES.

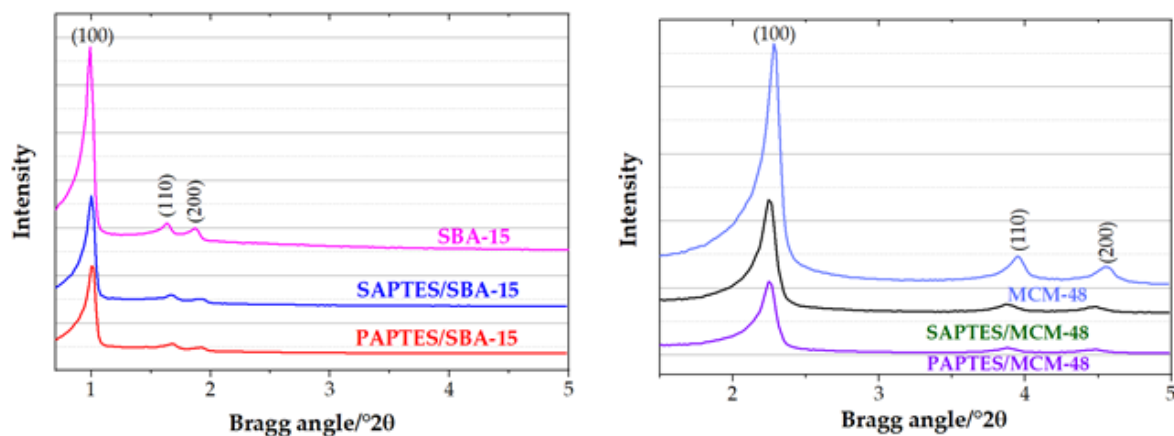

Figure S7. XRD of the initial and the modified SBA-15 and MCM-48 materials.

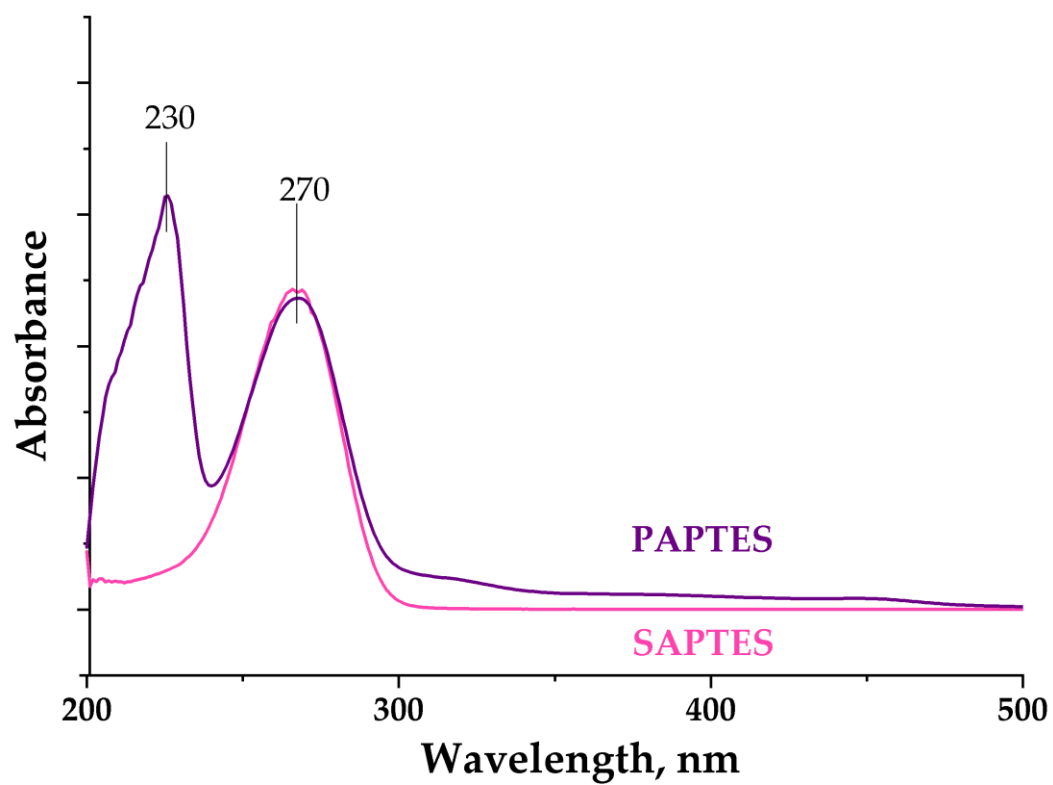

**Figure S8.** UV spectra of SAPTES and PAPTES.
